# Supplementary material for: DHEA Protects Human Cholangiocytes and Hepatocytes against Apoptosis and Oxidative Stress
Source: MDPI journal article supplement (doi:10.3390/cells11061038), 2022-03-18
Supplement: s1 [file s1]

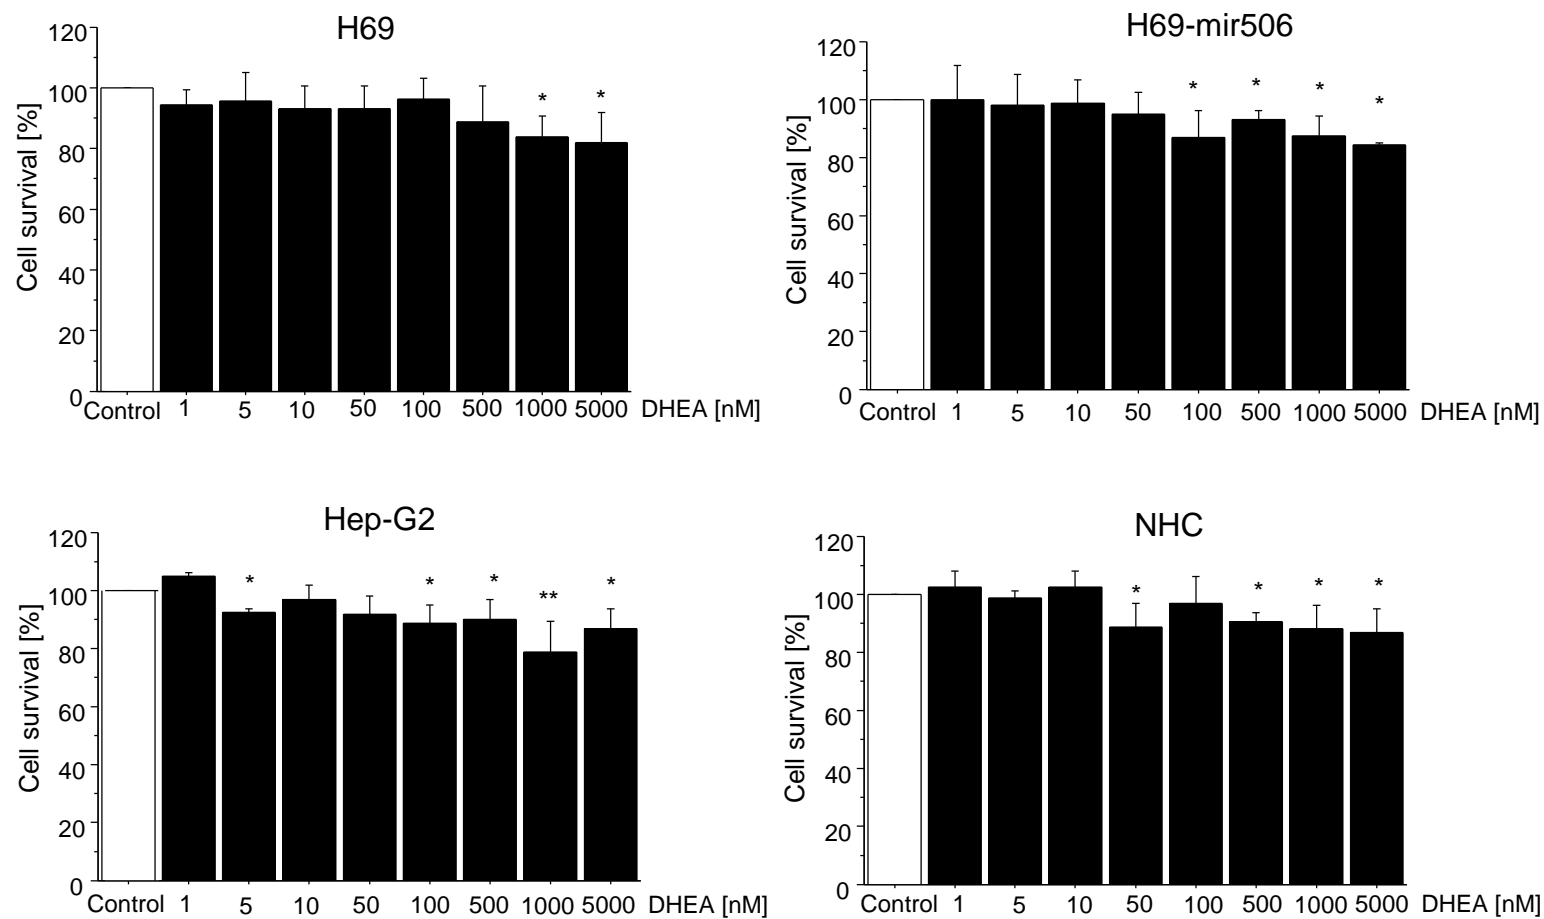

**Figure S1.** Dose - dependent effect of DHEA on cells survival (MTT assay).  
Results are presented as a mean $\pm$ SEM (n=3); \*p<0.05; \*\*p<0.01.

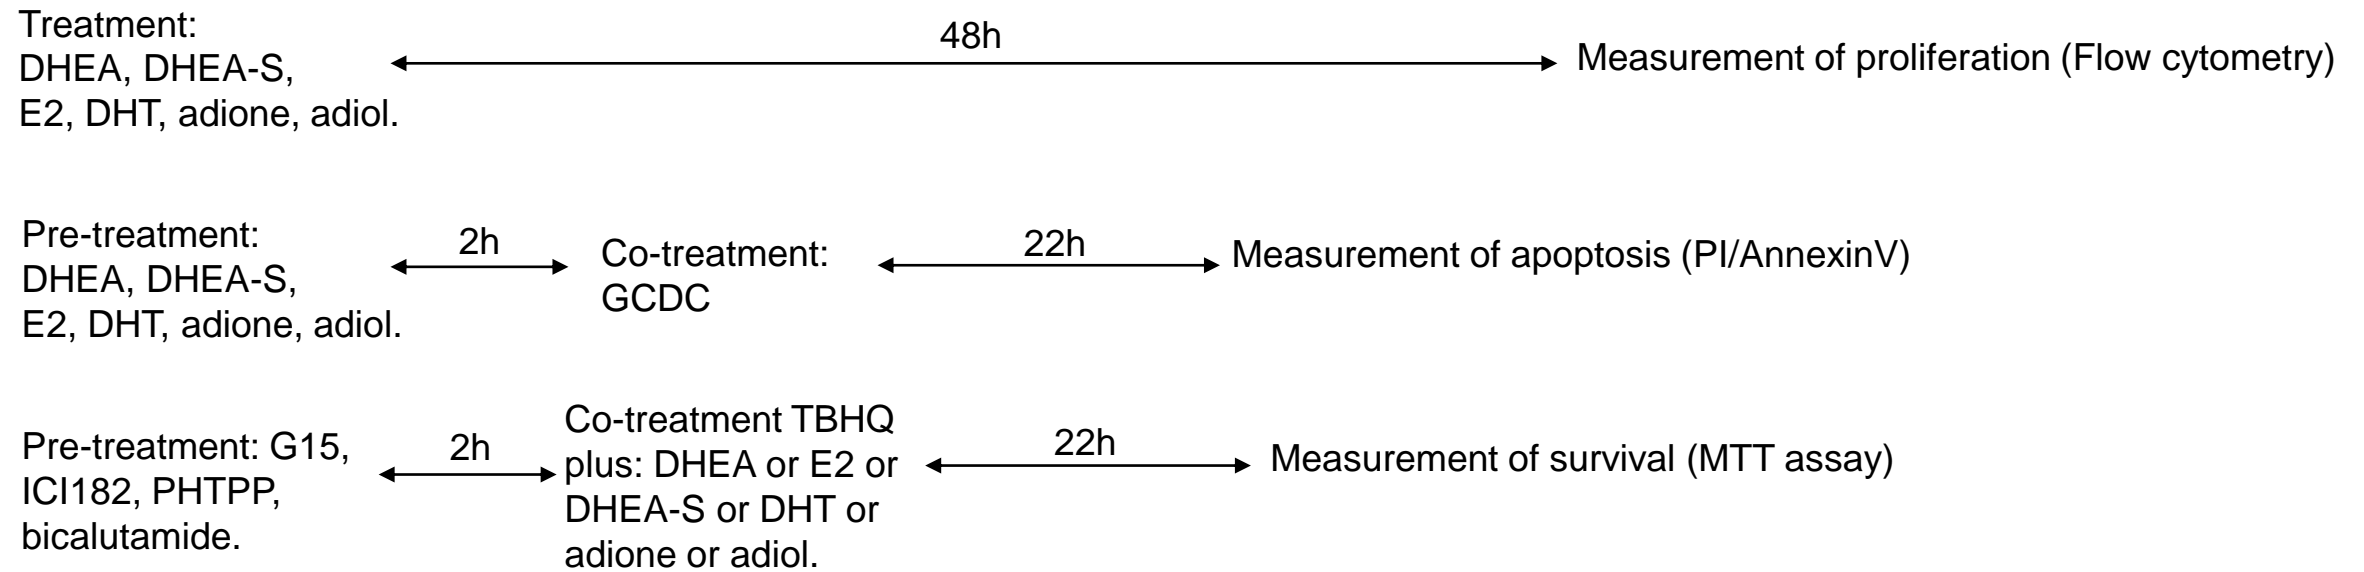

**Figure S2.** Time-line scheme of experiments
